# Supplementary material for: Ultrafast Hypothermia Selectively Mitigates the Early Humoral Response After Cardiac Arrest
Source: PubMed Central journal article supplement — J Am Heart Assoc. 2020 Nov 17;9(23):e017413. doi: 10.1161/JAHA.120.017413 (PMC7763769; doi:10.1161/jaha.120.017413), 2020-11-17
Supplement: JAH3-9-e017413-s001.pdf [file JAH3-9-e017413-s001.pdf]

# **Supplemental Material**

## Data S1.

### Supplemental Methods

#### *Flow cytometry*

In the Control and TLV groups, 100  $\mu$ L of peripheral blood samples were collected before the onset of cardiac arrest and at different time points throughout the procedure (i.e., 1 h, 3 h, 6 h and 24 h post-ROSC). Erythrocytes were lysed for 15 min, and the debris were washed away, in accordance to the manufacturer recommendations (RBC Lysing Buffer, Tebubio, Le Perray-en-Yvelines, France). Cells were then fixed in 0.5% paraformaldehyde/PBS before staining the next day. Then, cells were incubated with Fcblock, and stained using the following monoclonal antibodies: (APC)-labelled anti-T-cells marker (KEN5, 5  $\mu$ L, Santa Cruz Biotechnology, Dallas, TX, USA), phycoerythrin (PE)-labelled anti-CD4 (0.75  $\mu$ L, Lifespan Biosciences, Seattle, USA), fluorescein isothiocyanate (FITC)-labelled anti-CD8 (5  $\mu$ L, Lifespan Biosciences, Seattle, USA), APC-labelled anti-CD11b (clone M1/70, 1  $\mu$ L, EXBIO praha, Vestec, Czechoslovakia), FITC-labelled anti-CD14 : 5  $\mu$ L (Clone TÛ ,5  $\mu$ L, Lifespan Biosciences, Seattle, USA), APC-labelled anti-CD79a (clone HM57, 5  $\mu$ L, EXBIO praha, Vestec, Czechoslovakia). To perform surface antigen staining, cell suspensions were incubated on ice with appropriate mix of antibodies for 30 min. Then, cells were washed three times with a phosphate buffered saline solution containing bovine serum albumin (0.5%) and finally resuspended in running buffer for flow cytometry. Intracellular staining with CD79-a, for B-lymphocytes identification, was performed with Thermofisher Fix & Perm cell permeabilization kit ®, according to the manufacturer's instructions. Four-color flow cytometry was conducted with the BD Biosciences AccuriC6 device.

**Table S1: Blood gases and biochemical parameters throughout protocol in the different groups.** Data are expressed as mean  $\pm$  SEM.

Statistical comparisons were only made for group effect but not among time-points. \*,  $p < 0.05$  vs Sham; †,  $p < 0.05$  vs Control.

| Parameters and groups                                 | Baseline       | After ROSC      |                |                |
|-------------------------------------------------------|----------------|-----------------|----------------|----------------|
|                                                       |                | 30 min          | 360 min        | 24 h           |
| <u>Lactate blood level (mmol/L)</u>                   |                |                 |                |                |
| Sham                                                  | 4.7 $\pm$ 1.4  | 3.3 $\pm$ 1.7   | 3.7 $\pm$ 1.7  | 5.0 $\pm$ 4.7  |
| Control                                               | 5.7 $\pm$ 1.4  | 15.7 $\pm$ 1.4* | 9.1 $\pm$ 1.5* | 5.6 $\pm$ 2.2  |
| TLV                                                   | 4.3 $\pm$ 0.7  | 16.9 $\pm$ 1.0* | 7.4 $\pm$ 0.9  | 2.9 $\pm$ 1.2  |
| <u>Bicarbonate blood level (mmol/L)</u>               |                |                 |                |                |
| Sham                                                  | 28.4 $\pm$ 3.3 | 26.2 $\pm$ 1.6  | 27.0 $\pm$ 1.6 | 21.2 $\pm$ 1.9 |
| Control                                               | 28.6 $\pm$ 1.5 | 16.8 $\pm$ 2.4* | 20.5 $\pm$ 2.9 | 21.2 $\pm$ 2.0 |
| TLV                                                   | 27.4 $\pm$ 2.1 | 21.6 $\pm$ 1.4  | 20.8 $\pm$ 1.8 | 26.1 $\pm$ 3.0 |
| <u>Creatinine blood level (<math>\mu</math>mol/L)</u> |                |                 |                |                |
| Sham                                                  | 67 $\pm$ 11    | 59 $\pm$ 27     | 81 $\pm$ 14    | 85 $\pm$ 10    |
| Control                                               | 62 $\pm$ 12    | 158 $\pm$ 53    | 107 $\pm$ 39   | 136 $\pm$ 45   |
| TLV                                                   | 53 $\pm$ 8     | 121 $\pm$ 39    | 82 $\pm$ 8     | 88 $\pm$ 23    |
| <u>Glucose blood level (mg/dL)</u>                    |                |                 |                |                |
| Sham                                                  | 1.8 $\pm$ 0.1  | 1.6 $\pm$ 0.1   | 1.6 $\pm$ 0.1  | 1.7 $\pm$ 0.1  |
| Control                                               | 1.7 $\pm$ 0.1  | 3.9 $\pm$ 0.1*  | 3.4 $\pm$ 0.8* | 1.7 $\pm$ 0.2  |
| TLV                                                   | 2.0 $\pm$ 0.1  | 4.1 $\pm$ 0.3*  | 3.1 $\pm$ 0.4* | 1.3 $\pm$ 0.1  |

**Figure S1. Leukocytes counts in the peripheral circulation throughout the experimental protocol in the different groups.**

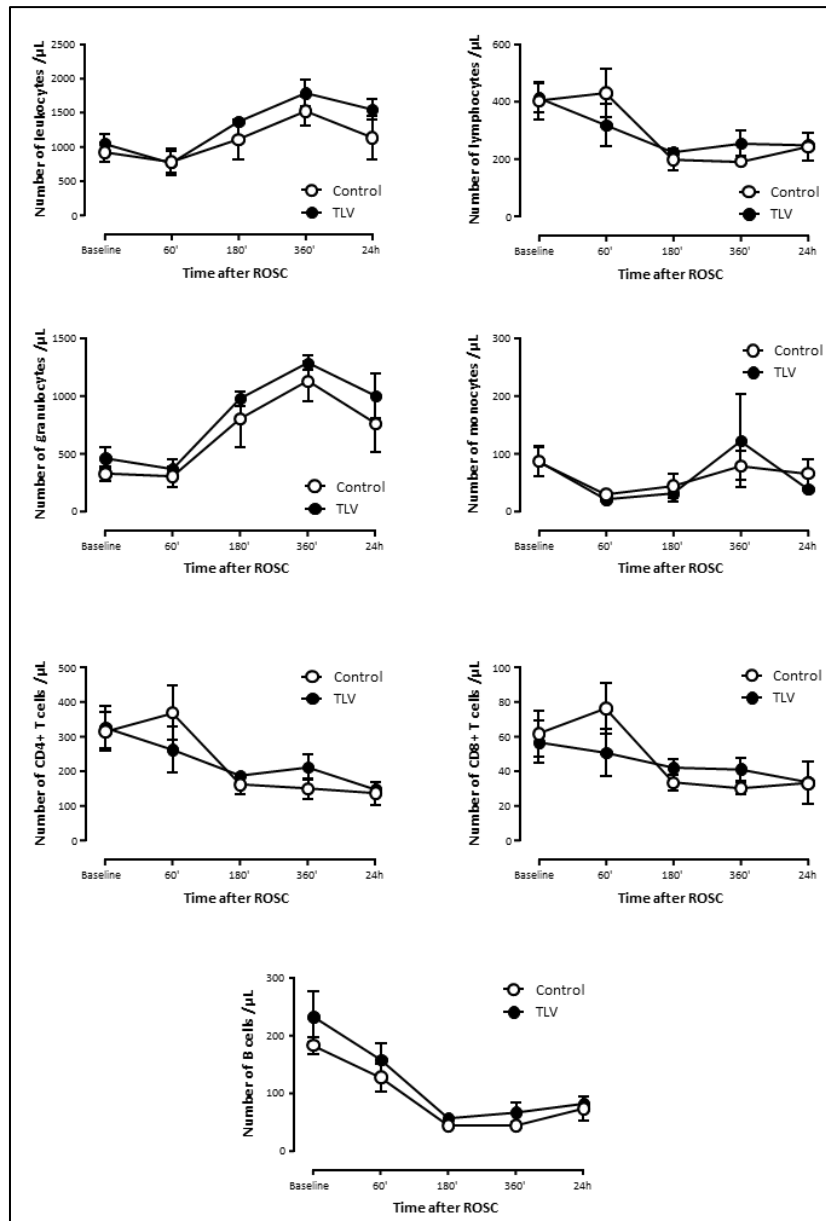

Granulocytes were considered as CD11<sup>+</sup>CD14<sup>-</sup> cells, monocytes as CD11<sup>+</sup>CD14<sup>+</sup> cells and B cells as CD79a<sup>+</sup> cells. T cells were identified thanks to a specific marker and further classified as CD4<sup>+</sup> or CD8<sup>+</sup>.

*Data are expressed as mean ± sem. Statistical comparisons were only made between groups but not among different time points; TLV, total liquid ventilation, ROSC, resumption of spontaneous circulation.*

**Figure S2. Blood transcription level of interleukin (IL)-6, IL-1 $\beta$  and Tumor Necrosis Factor (TNF)- $\alpha$  in patients after out-of-hospital cardiac arrest.**

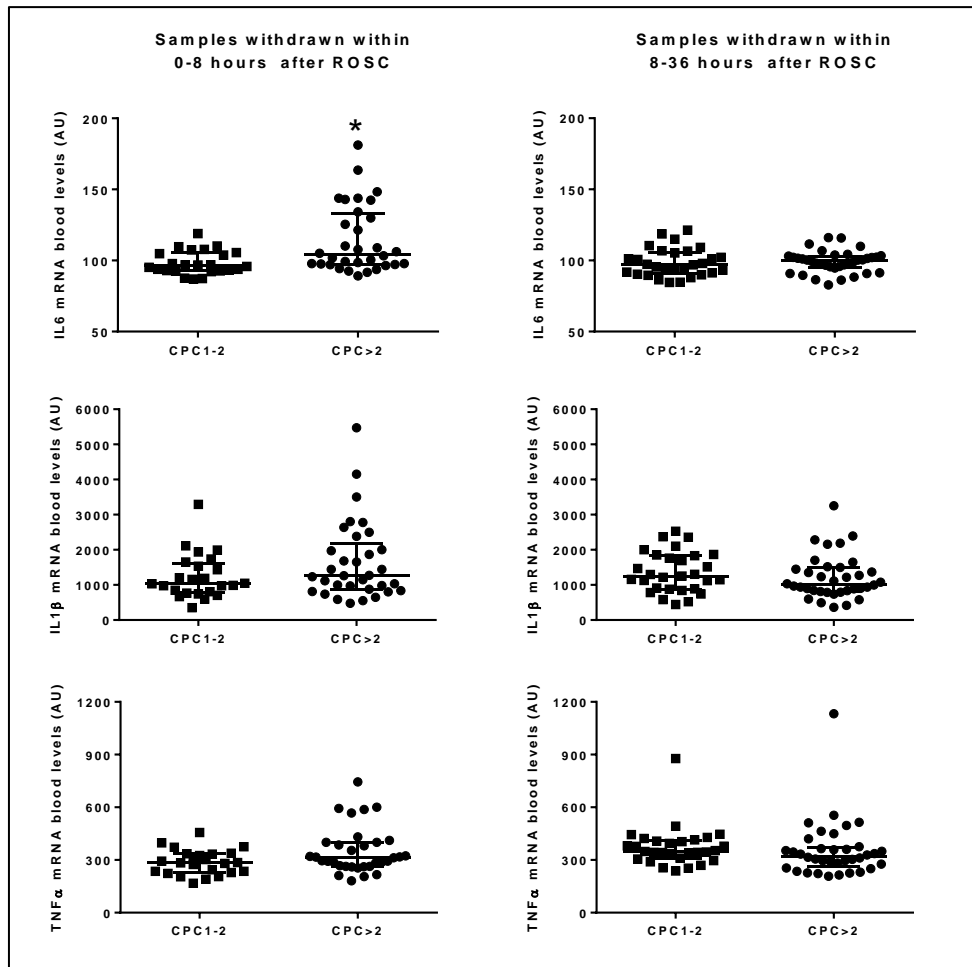

Transcription levels were analyzed in samples withdrawn within 0-8 h vs 8-36 h after cardiac arrest (n=58 and 73, respectively). They were compared in patients with favorable vs poor neurological outcome, *i.e.*, cerebral performance category (CPC)1-2 (n=25 and 33 for patients sampled <8 h and between 8-30 hours, respectively) vs CPC>2 (n=28 and 35 patients sampled <8 h and between 8-30 hours, respectively). Open circles and bold lines represent individual and mean values, respectively.

*Data are expressed as individual (squares and circles), medians and interquartile values. \*, p<0.05 vs corresponding CPC 1-2.*
